## Correction: Metabolite quantification of faecal extracts from colorectal cancer patients and healthy controls

Gwénaëlle Le Gall<sup>1,\*</sup>, Kiran Guttula<sup>2,\*</sup>, Lee Kellingray<sup>1,\*</sup>, Adrian J. Tett<sup>3</sup>, Rogier ten Hoopen<sup>2</sup>, E. Kate Kemsley<sup>1</sup>, George M. Savva<sup>1</sup>, Ashraf Ibrahim<sup>2,\*</sup> and Arjan Narbad<sup>1,\*</sup>

<sup>1</sup> Quadram Institute Bioscience, Norwich Research Park, Norwich, UK

<sup>2</sup> Division of Molecular Histopathology, Department of Pathology, University of Cambridge, Cambridge, UK

<sup>3</sup> Centre for Integrative Biology, University of Trento, Trento, Italy

\* These authors contributed equally to this work

**Published:** February 26, 2019

**Copyright:** Le Gall et al. This is an open-access article distributed under the terms of the Creative Commons Attribution License 3.0 (CC BY 3.0), which permits unrestricted use, distribution, and reproduction in any medium, provided the original author and source are credited.

**This article has been corrected:** The correct author name is given below:

**E. Kate Kemsley**

Original article: Oncotarget. 2018; 9:33278-33289. <https://doi.org/10.18632/oncotarget.26022>
